# Supplementary material for: RYR2, PTDSS1 and AREG genes are implicated in a Lebanese population-based study of copy number variation in autism
Source: PubMed Central journal article supplement (PMC4705475; doi:10.1038/srep19088), 2016-01-08
Supplement: srep19088-s1.pdf [file srep19088-s1.pdf]

# ***RYR2*, *PTDSS1* and *AREG* genes are implicated in a Lebanese population-based study of copy number variation in autism**

Jihane Soueid<sup>1,\*</sup>, Silva Kourtian<sup>1,\*</sup>, Nadine J Makhoul<sup>1</sup>, Joelle Makoukji<sup>1</sup>, Sariah Haddad<sup>1</sup>, Simona S Ghanem<sup>1</sup>, Firas Kobeissy<sup>2</sup> and Rose-Mary Boustany<sup>1,2,†</sup>

## Supplementary Figures

Supplementary Figure1.

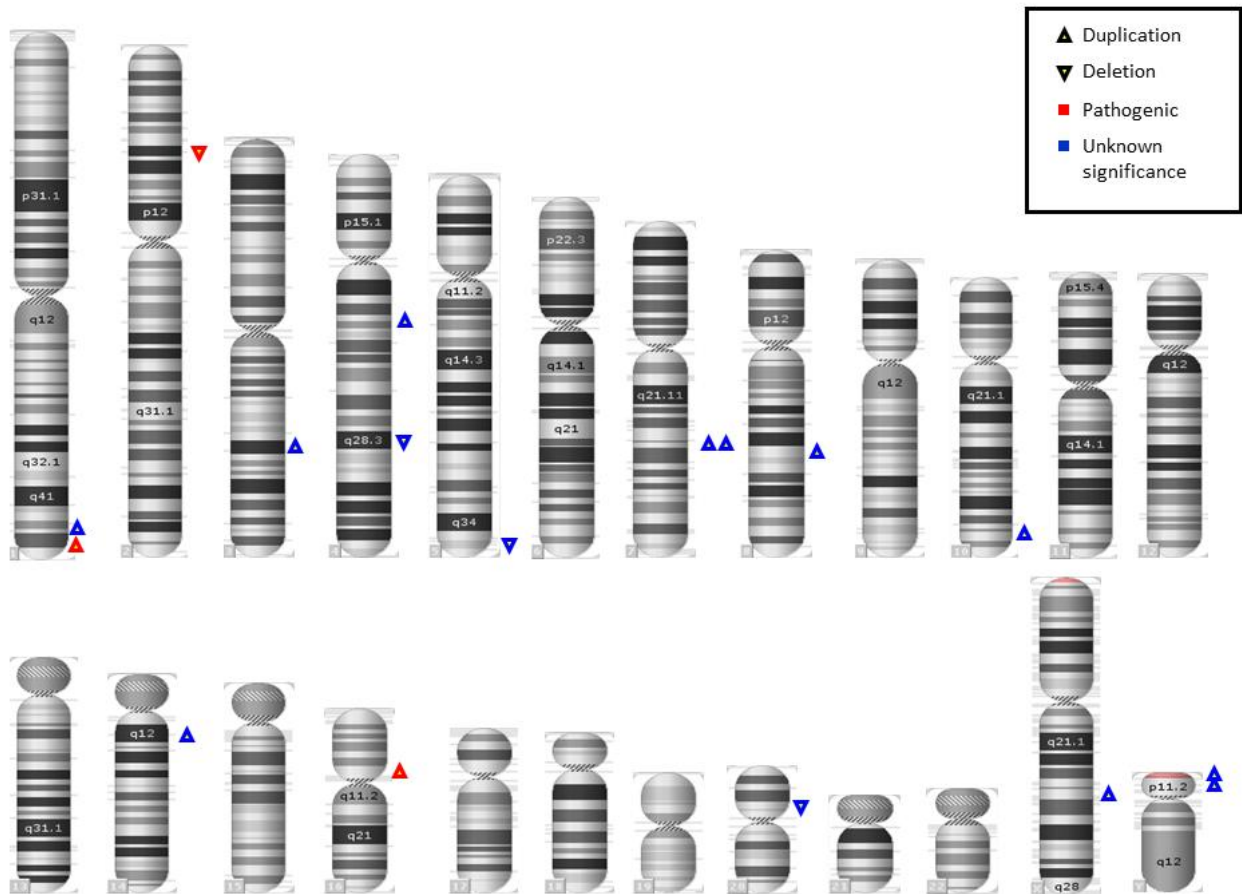

## Supplementary Figure2.

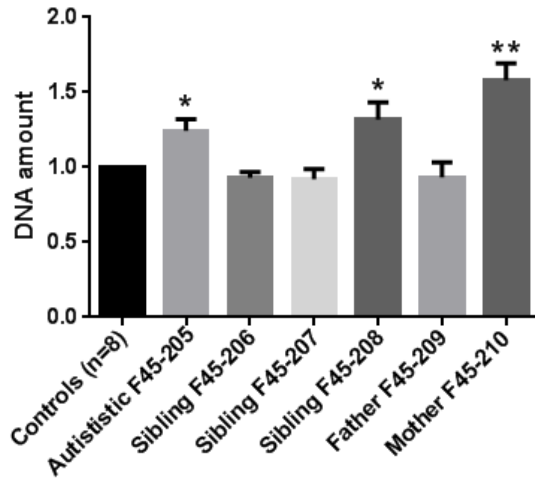

## Supplementary figures legends

**Supplementary figure 1.** Schematic diagram portraying pathogenic CNVs (red) and CNVs of unknown significance (blue) found in Lebanese autism patients on different chromosomal positions.

**Supplementary figure 2.** qPCR assays to validate 1q42 duplication using primers within the exon 37 of *RYR2* gene. Values are means of the fold changes normalized to *GAPDH* DNA amount, with their standard errors represented by vertical bars.\* $p < 0.05$ , \*\* $p < 0.01$  by Student's t-test ( $n=4$ ). The healthy siblings F45-206, F45-207 and the father F45-209 have a normal copy number similar to controls, whereas the autistic patient F45-205, the healthy sibling F45-208 and the mother F45-210 show a duplication.

## Supplementary tables

**Supplementary table 1.** *De novo* CNVs identified in patients with ASD classified as benign and likely benign.

| ID     | Cytoband | Type | Location            | Size (kb) | Genes                                                  | Classification |
|--------|----------|------|---------------------|-----------|--------------------------------------------------------|----------------|
| LAS6   | 4q35.2   | Gain | 189335700-189519024 | 183       | LOC401164                                              | Likely benign  |
|        | 12p12.3  | Gain | 19468069-19580378   | 112       | PLEKHA5                                                | Benign         |
| LAS17  | Yp11.2   | Gain | 9198721-9319924     | 121       | FAM197Y2P, TSPY1, TSPY3, TSPY4                         | Benign         |
| CLIN19 | 1q42.3   | Gain | 235164385-235611093 | 447       | GGPS1, B3GALNT2, TOMM20, SNORA14B, ARID4B, RBM34, TBCE | Benign         |
| CLIN24 | 1q44     | Loss | 248688571-248795277 | 107       | OR2T10, OR2T29, OR2T34, OR2T11                         | Benign         |
|        | 10q26.3  | Gain | 135252897-135372601 | 120       | SYCE1, SPRNP1, CYP2E1, LOC619207                       | Benign         |
| CLIN34 | 4q13.2   | Gain | 69367092-69540427   | 173       | UGT2B15, UGT2B17                                       | Benign         |
| BAK40  | 3p12.3   | Gain | 75671971-75908054   | 236       | ZNF717, FRG2C                                          | Benign         |
|        | 7p14.1   | Loss | 38290298-38402607   | 112       | TARP                                                   | Benign         |
|        | 8p23.3   | Gain | 684607-1219586      | 535       | No genes                                               | Benign         |
| BAK42  | 9q34.3   | Loss | 140612478-140682881 | 70        | EHMT1                                                  | Likely benign  |

**Supplementary table 2.** Inherited CNVs identified in patients with ASD classified as benign and likely benign.

| ID    | Cytoband | Type | Location            | Size (kb) | Genes                               | Classification | Inheritance     |
|-------|----------|------|---------------------|-----------|-------------------------------------|----------------|-----------------|
| SES2  | 7q32.3   | Gain | 131430119-132076332 | 646       | PLXNA4                              | Likely benign  | Mother          |
| LAS6  | 15q15.2  | Loss | 43871160-43972150   | 101       | CATSPER2, CKMT1B, STRC, PPIP5K1     | Benign         | Father & Mother |
| LAS7  | 9p24.1   | Gain | 5812163-5987927     | 176       | MLANA, KIAA2026, ERMP1              | Benign         | Mother          |
|       | 10p11.1  | Gain | 38244992-38647577   | 403       | ZNF37A, ZNF33A, LOC100129055, ZNF25 | Likely benign  | Mother          |
|       | 19q13.43 | Gain | 56310321-56517347   | 207       | NLRP4/5/8/11/13                     | Benign         | Mother          |
| LAS11 | 9p23     | Loss | 11994297-12124344   | 130       | No genes                            | Likely benign  | Mother          |

|        |               |      |                     |      |                                                |               |                 |
|--------|---------------|------|---------------------|------|------------------------------------------------|---------------|-----------------|
| LAS15  | 3q21.6        | Gain | 165203570-165406756 | 203  | no genes                                       | Benign        | Father          |
|        | 18q22.1       | Loss | 64070273-64294890   | 225  | CDH19                                          | Benign        | Mother          |
| LAS17  | 14q12         | Loss | 27537145-27737791   | 201  | No genes                                       | Likely benign | Father          |
| CLIN18 | 2q22.1        | Loss | 142050109-142166828 | 117  | LRP1B                                          | Benign        | Father          |
|        | 7p12.1        | Loss | 53459876-53591589   | 132  | No genes                                       | Benign        | Mother          |
| CLIN19 | 2q31.1        | Gain | 176919432-177066433 | 147  | HOXD3/4/8/9/10/11/12/13, EVX2                  | Benign        | Father & Mother |
|        | 7q35          | Loss | 146099648-146330586 | 231  | CNTNAP2 (intronic)                             | Likely benign | Mother          |
|        | 15q15.3       | Gain | 43859057-44041632   | 183  | CKMT1B, CATSPER2, CKMT1A, PPIP5K1, PDIA3, STRC | Benign        | Father & Mother |
| CLIN24 | 22q11.23q12.1 | Loss | 25656237-25925078   | 269  | CRYBB2P1, LRP5L, IGLL3P                        | Benign        | Father          |
| CLIN27 | 8q24.23       | Loss | 137687247-137863344 | 176  | no genes                                       | Benign        | Mother          |
|        | 14q21.1       | Loss | 40717147-40896831   | 180  | No genes                                       | Benign        | Mother          |
| SAI31  | 3q26.1        | Loss | 162182181-163158948 | 977  | LOC647107                                      | Likely benign | Mother          |
|        | 4p15.1        | Loss | 28739163-28866444   | 127  | No genes                                       | Likely benign | Mother          |
| SAI33  | 16p12.3       | Gain | 16293540-16857531   | 564  | ABCC6, PKD1P1, NOMO3                           | Likely benign | Father          |
|        | 16p12.3       | Gain | 18236096-18696746   | 461  | NOMO2, ABCC6P1                                 | Likely benign | Father          |
| CLIN35 | Xq28          | Gain | 148873358-149006650 | 133  | No genes                                       | Benign        | Mother          |
| BAK39  | 1p31.1        | Gain | 75142005-75580191   | 438  | CRYZ, TYW3                                     | Likely benign | Mother          |
|        | 20p12.1       | Loss | 14788354-15093936   | 306  | MACROD2                                        | Benign        | Father          |
| SAI36  | 2q11.2        | Loss | 97936901-98065927   | 129  | No genes                                       | Likely benign | Father          |
|        | 3p12.3        | Gain | 75093330-76311299   | 1218 | ZNF717, FAM86D, FRG2C                          | Likely benign | Father          |
|        | 11q25         | Gain | 134412773-134744182 | 331  | no genes                                       | Benign        | Mother          |
| BAK37  | 7p12.1        | Loss | 53460807-53591589   | 131  | No genes                                       | Benign        | Father          |
| BAK38  | 11q22.3       | Loss | 109067949-109181323 | 113  | No genes                                       | Likely benign | Mother          |
|        | 12q23.2       | Gain | 102286925-102629437 | 343  | C12orf48, DRAM1, CCDC53, NUP37, PMCH           | Likely benign | Mother          |
| BAK41  | 7p12.1        | Loss | 53458839-53590535   | 132  | No genes                                       | Benign        | Mother          |

|       |          |      |                     |     |                                    |               |                 |
|-------|----------|------|---------------------|-----|------------------------------------|---------------|-----------------|
|       | 10q26.3  | Gain | 135252346-135372601 | 120 | LOC619207, CYP2E1, SYCE1           | Benign        | Father          |
|       | 12q24.33 | Gain | 132594436-132955402 | 361 | EP400NL, DDX51, NOC4L, GALNT9      | Likely benign | Father          |
|       | 17q12    | Loss | 36283806-36404136   | 120 | TBC1D3, LOC440434                  | Likely benign | Father          |
| BAK42 | 19p12    | Loss | 20596105-20716140   | 120 | ZNF826P                            | Benign        | Father          |
|       | Xq25     | Loss | 126889708-127147105 | 257 | No genes                           | Likely benign | Mother          |
| BAK43 | 9p23     | Loss | 12000099-12127088   | 127 | no genes                           | Benign        | Father          |
|       | 16p11.2  | Gain | 34449594-34755816   | 306 | LOC283914, LOC146481, LOC100130700 | Benign        | Father          |
|       | 19p12    | Loss | 20598429-20716153   | 118 | ZNF826P                            | Benign        | Father          |
|       | 1q44     | Loss | 248688586-248795277 | 107 | OR2T10/11/29/34                    | Benign        | Mother          |
| BAK44 | 1q44     | Loss | 20596105-20716140   | 120 | ZNF826P                            | Benign        | father          |
|       | 2q22.1   | Loss | 126889708-127147105 | 257 | No genes                           | Likely benign | Mother          |
| BAK45 | 19p12    | Loss | 20596105-20716376   | 120 | ZNF826P                            | Benign        | Father & Mother |
| BAK46 | 19p12    | Loss | 20598429-20716376   | 118 | ZNF826P                            | Benign        | Father          |

**Supplementary table 3.** Gene ontology (GO) enrichment analysis among genes included in all CNVs classified as pathogenic, likely pathogenic, and of unknown significance.

| Category        | Term                                     | Genes                                      | Nb of genes | Corrected P-values* |
|-----------------|------------------------------------------|--------------------------------------------|-------------|---------------------|
| GOTERM_BP_ALL   | anatomical structure morphogenesis       | HMX3, HMX2, HECTD1, TBX6, ZIC1, NRXN1, SPN | 7           | 0.049               |
| SP_PIR_KEYWORDS | neurogenesis                             | HMX3, HMX2, ZIC1                           | 3           | 0.048               |
| GOTERM_BP_ALL   | embryonic development                    | HMX3, HMX2, HECTD1, TBX6, ZIC1             | 5           | 0.038               |
| GOTERM_BP_ALL   | organ morphogenesis                      | HMX3, HMX2, HECTD1, TBX6, ZIC1             | 5           | 0.037               |
| GOTERM_BP_ALL   | embryonic organ morphogenesis            | HMX3, HMX2, ZIC1                           | 3           | 0.036               |
| GOTERM_BP_ALL   | pyridine nucleotide biosynthetic process | NAMPT, QPRT                                | 2           | 0.033               |
| SP_PIR_KEYWORDS | pyridine nucleotide biosynthesis         | NAMPT, QPRT                                | 2           | 0.028               |

|               |                                                           |                                |   |       |
|---------------|-----------------------------------------------------------|--------------------------------|---|-------|
| GOTERM_BP_ALL | nicotinamide nucleotide biosynthetic process              | NAMPT, QPRT                    | 2 | 0.022 |
| GOTERM_BP_ALL | NAD biosynthetic process                                  | NAMPT, QPRT                    | 2 | 0.020 |
| GOTERM_BP_ALL | ear development                                           | HMX3, HMX2, ZIC1               | 3 | 0.019 |
| GOTERM_BP_ALL | inner ear development                                     | HMX3, HMX2, ZIC1               | 3 | 0.014 |
| GOTERM_BP_ALL | ear morphogenesis                                         | HMX3, HMX2, ZIC1               | 3 | 0.010 |
| GOTERM_BP_ALL | inner ear morphogenesis                                   | HMX3, HMX2, ZIC1               | 3 | 0.007 |
| GOTERM_BP_ALL | embryonic morphogenesis                                   | HMX3, HMX2, HECTD1, TBX6, ZIC1 | 5 | 0.005 |
| COG_ONTOLOGY  | Transcription / Cell division and chromosome partitioning | MAZ, ZIC1, ZIC4                | 3 | 0.004 |

\*Fisher Exact P-values corrected for multiple comparisons in Benjamini-Hochberg test.

**Supplementary table 4.** Studies and citations for each relation within the network build between genes included in CNVs classified as pathogenic, likely pathogenic, and of unknown significance and different entities related to identified deficits in ASDs using Pathway studio.

| Relation            | Type       | TextRef                     |
|---------------------|------------|-----------------------------|
| AREG --> DNA repair | Regulation | info:pmid/21665306#body:86  |
| AREG --> MAPK3      | Regulation | info:pmid/23108309#abs:10   |
| AREG --> MAPK3      | Regulation | info:pmid/16261397#abs:8    |
| AREG --> MAPK3      | Regulation | info:pmid/12869389#abs:9    |
| AREG --> MAPK3      | Regulation | info:pmid/12055597#abs:5    |
| AREG --> MAPK3      | Regulation | info:pmid/17536007#abs:8    |
| AREG --> MAPK3      | Regulation | info:pmid/12589827#abs:5    |
| AREG --> MAPK3      | Regulation | info:pmid/21047912#abs:10   |
| AREG --> MAPK3      | Regulation | info:pmid/20826789#abs:7    |
| AREG --> MAPK3      | Regulation | info:pmid/21665306#body:47  |
| AREG --> MAPK3      | Regulation | info:pmid/16314835#body:67  |
| AREG --> MAPK3      | Regulation | info:pmid/24124521#cont:233 |
| AREG --> MAPK3      | Regulation | info:pmid/20610537#cont:179 |
| AREG --> MAPK3      | Regulation | info:pmid/17901238#body:189 |
| AREG --> MAPK3      | Regulation | info:pmid/19880654#body:193 |
| AREG --> MAPK3      | Regulation | info:pmid/23010081#body:115 |
| AREG --> MAPK3      | Regulation | info:pmid/16543407#body:164 |
| AREG --> MAPK3      | Regulation | info:pmid/17363371#body:195 |
| AREG --> MAPK3      | Regulation | info:pmid/23086930#cont:162 |

|                                         |            |                                                |
|-----------------------------------------|------------|------------------------------------------------|
| AREG --> MAPK3                          | Regulation | info:pmid/12743035#body:135                    |
| AREG --> MAPK3                          | Regulation | info:pmid/23277062#cont:195                    |
| AREG --> MAPK3                          | Regulation | info:pmid/21483252#cont:218                    |
| AREG --> MAPK3                          | Regulation | info:pmid/20736313#cont:232                    |
| AREG --> MAPK3                          | Regulation | info:pmid/21562239#cont:170                    |
| AREG --> MAPK3                          | Regulation | info:pmid/21565184#body:140                    |
| AREG --> MAPK3                          | Regulation | info:doi/10.1016/S0006-291X(03)00093-7#body:88 |
| AREG --> MAPK3                          | Regulation | info:doi/10.1053/j.gastro.2004.11.006#body:93  |
| AREG --> MAPK3                          | Regulation | info:doi/10.1186/1478-811X-11-86#cont:159      |
| AREG --> MAPK3                          | Regulation | info:doi/10.1016/j.mce.2011.12.005#body:48     |
| AREG ---> chronic inflammation          | Regulation | info:pmid/20498653#cont:327                    |
| AREG ---> immune response               | Regulation | info:pmid/19494503#abs:1                       |
| KCTD13 ---> DNA repair                  | Regulation | info:pmid/23032261#cont:199                    |
| MAPK3 ---> Bipolar Disorder             | Regulation | info:pmid/22884480#body:156                    |
| MAPK3 ---> chronic inflammation         | Regulation | info:pmid/21983072#body:214                    |
| MAPK3 ---> chronic inflammation         | Regulation | info:doi/10.1016/j.ajpath.2010.11.016#body:139 |
| MAPK3 ---> mitochondrial depolarization | Regulation | info:pmid/15788397#abs:8                       |
| MAPK3 ---> mitochondrial depolarization | Regulation | info:pmid/12218054#abs:9                       |
| MAPK3 ---> mitochondrial depolarization | Regulation | info:pmid/16705147#abs:10                      |
| MAPK3 ---> mitochondrial depolarization | Regulation | info:pmid/20442495#cont:157                    |
| MAPK3 ---> mitochondrial depolarization | Regulation | info:pmid/18617697#body:221                    |
| MAPK3 ---> mitochondrial depolarization | Regulation | info:doi/10.1016/j.bpj.2012.11.3632#body:3     |
| MAPK3 ---> neuronal death               | Regulation | info:pmid/19843173#abs:5                       |
| MAPK3 ---> neuronal death               | Regulation | info:pmid/10854274#abs:8                       |
| MAPK3 ---> neuronal death               | Regulation | info:pmid/21933187#abs:7                       |
| MAPK3 ---> neuronal death               | Regulation | info:pmid/21509715#cont:173                    |
| MAPK3 ---> neuronal death               | Regulation | info:pmid/17664275#body:353                    |
| MAPK3 ---> neuronal death               | Regulation | info:pmid/22094065#body:134                    |
| MAPK3 ---> neuronal death               | Regulation | info:pmid/18635668#body:348                    |
| MAPK3 ---> neuronal death               | Regulation | info:pmid/12676331#body:5                      |
| MAPK3 ---> neuronal death               | Regulation | info:pmid/20971569#body:13                     |
| MAPK3 ---> neuronal death               | Regulation | info:pmid/24055892#body:12                     |
| MAPK3 ---> neuronal death               | Regulation | info:pmid/15893468#body:100                    |
| MAPK3 ---> neuronal death               | Regulation | info:pmid/17870450#body:106                    |
| MAPK3 ---> neuronal death               | Regulation | info:pmid/21422171#cont:462                    |

|                                 |            |                                                  |
|---------------------------------|------------|--------------------------------------------------|
| MAPK3 --> neuronal death        | Regulation | info:pmid/17915333#body:203                      |
| MAPK3 --> neuronal death        | Regulation | info:pmid/17420100#body:11                       |
| MAPK3 --> neuronal death        | Regulation | info:pmid/21621864#body:97                       |
| MAPK3 --> neuronal death        | Regulation | info:pmid/23466131#body:14                       |
| MAPK3 --> neuronal death        | Regulation | info:pmid/24376709#cont:200                      |
| MAPK3 --> neuronal death        | Regulation | info:pmid/23439385#body:187                      |
| MAPK3 --> neuronal death        | Regulation | info:pmid/17888506#body:104                      |
| MAPK3 --> neuronal death        | Regulation | info:pmid/17716970#body:438                      |
| MAPK3 --> neuronal death        | Regulation | info:pmid/19201991#body:302                      |
| MAPK3 --> neuronal death        | Regulation | info:pmid/19766676#body:169                      |
| MAPK3 --> neuronal death        | Regulation | info:pmid/22275360#cont:172                      |
| MAPK3 --> neuronal death        | Regulation | info:pmid/17126142#body:97                       |
| MAPK3 --> neuronal death        | Regulation | info:pmid/24004478#cont:221                      |
| MAPK3 --> neuronal death        | Regulation | info:pmid/19799986#body:90                       |
| MAPK3 --> neuronal death        | Regulation | info:pmid/14769794#body:332                      |
| MAPK3 --> neuronal death        | Regulation | info:pmid/15193300#body:167                      |
| MAPK3 --> neuronal death        | Regulation | info:pmid/19293391#body:315                      |
| MAPK3 --> neuronal death        | Regulation | info:pmid/16537649#body:254                      |
| MAPK3 --> neuronal death        | Regulation | info:pmid/20463217#body:313                      |
| MAPK3 --> neuronal death        | Regulation | info:pmid/12392791#body:85                       |
| MAPK3 --> neuronal death        | Regulation | info:pmid/14552884#body:103                      |
| MAPK3 --> neuronal death        | Regulation | info:pmid/17524349#body:232                      |
| MAPK3 --> neuronal death        | Regulation | info:pmid/18354014#body:325                      |
| MAPK3 --> neuronal death        | Regulation | info:pmid/19038359#body:141                      |
| MAPK3 --> neuronal death        | Regulation | info:doi/10.1016/j.brainres.2010.05.079#body:94  |
| MAPK3 --> neuronal death        | Regulation | info:doi/10.1016/j.brainres.2010.01.063#body:113 |
| MAPK3 --> neuronal death        | Regulation | info:pmid/15153094#body:109                      |
| MAPK3 --> synaptic transmission | Regulation | info:pmid/15086522#abs:2                         |
| MAPK3 --> synaptogenesis        | Regulation | info:pmid/18801922#body:95                       |
| MAPK3 --> synaptogenesis        | Regulation | info:pmid/20136499#cont:458                      |
| MAPK3 --> synaptogenesis        | Regulation | info:pmid/24157150#title:1                       |
| MAPK3 --> synaptogenesis        | Regulation | info:pmid/22394481#body:108                      |
| MAPK3 --> synaptogenesis        | Regulation | info:doi/10.1016/j.neuro.2012.02.013#body:108    |
| MAPK3 --> Autistic Disorder     | Regulation | info:pmid/21848643#abs:12                        |
| MAPK3 --> Autistic Disorder     | Regulation | info:pmid/22555958#abs:6                         |
| MAPK3 --> Autistic Disorder     | Regulation | info:pmid/21595826#abs:13                        |
| MAPK3 --> axon cargo transport  | Regulation | info:pmid/12757748#body:408                      |
| MAPK3 --> axonogenesis          | Regulation | info:pmid/12367631#body:99                       |
| MAPK3 --> axonogenesis          | Regulation | info:pmid/23349896#cont:182                      |
| MAPK3 --> axonogenesis          | Regulation | info:doi/10.1016/j.mcn.2004.11.005#body:135      |



|                                 |            |                                                |
|---------------------------------|------------|------------------------------------------------|
| MAPK3 ---> brain development    | Regulation | info:pmid/21248139#abs:11                      |
| MAPK3 ---> brain development    | Regulation | info:pmid/22095091#abs:11                      |
| MAPK3 ---> DNA repair           | Regulation | info:pmid/16052235#abs:6                       |
| MAPK3 ---> DNA repair           | Regulation | info:pmid/21742020#body:135                    |
| MAPK3 ---> DNA repair           | Regulation | info:pmid/19371614#body:250                    |
| MAPK3 ---> DNA repair           | Regulation | info:pmid/23069143#body:116                    |
| MAPK3 ---> DNA repair           | Regulation | info:pmid/11454682#body:210                    |
| MAPK3 ---> immune response      | Regulation | info:pmid/19326394#abs:5                       |
| MAPK3 ---> immune response      | Regulation | info:pmid/19091877#abs:7                       |
| MAPK3 ---> immune response      | Regulation | info:pmid/19015047#body:76                     |
| MAPK3 ---> immune response      | Regulation | info:pmid/22446503#body:109                    |
| MAPK3 ---> immune response      | Regulation | info:pmid/9614082#body:253                     |
| MAPK3 ---> immune response      | Regulation | info:pmid/21238948#body:159                    |
| MAPK3 ---> immune response      | Regulation | info:pmid/18211830#body:117                    |
| MAPK3 ---> immune response      | Regulation | info:pmid/16952481#body:151                    |
| MAPK3 ---> immune response      | Regulation | info:pmid/23176885#body:8                      |
| MAPK3 ---> immune response      | Regulation | info:pmid/21731758#cont:200                    |
| MAPK3 ---> immune response      | Regulation | info:doi/10.1016/j.jss.2006.12.199#body:19     |
| MAPK3 ---> immune response      | Regulation | info:doi/10.1016/j.intimp.2012.03.005#body:109 |
| MAPK3 ---> immune response      | Regulation | info:pmid/18524942#body:53                     |
| MAPK3 ---> mitochondrial damage | Regulation | info:pmid/16045454#abs:9                       |
| MAPK3 ---> mitochondrial damage | Regulation | info:pmid/12218054#abs:6                       |
| MAPK3 ---> mitochondrial damage | Regulation | info:pmid/16167071#abs:6                       |
| MAPK3 ---> mitochondrial damage | Regulation | info:pmid/18594523#body:314                    |
| MAPK3 ---> mitochondrial damage | Regulation | info:pmid/20639456#body:138                    |
| MAPK3 ---> mitochondrial damage | Regulation | info:pmid/12507775#body:213                    |
| MAPK3 ---> mitochondrial damage | Regulation | info:pmid/15093752#body:70                     |
| MAPK3 ---> mitochondrial damage | Regulation | info:pmid/19563915#body:176                    |
| MAPK3 ---> mitochondrial damage | Regulation | info:pmid/23220614#body:94                     |
| MAPK3 ---> mitochondrial damage | Regulation | info:pmid/15905098#body:127                    |
| MAPK3 ---> mitochondrial damage | Regulation | info:pmid/23148948#body:15                     |
| MAPK3 ---> mitochondrial damage | Regulation | info:pmid/19919859#body:110                    |

|                                           |            |                                                 |
|-------------------------------------------|------------|-------------------------------------------------|
| MAPK3 ---> mitochondrial damage           | Regulation | info:doi/10.1016/S0006-291X(03)00060-3#body:125 |
| MAPK3 ---> mitochondrial damage           | Regulation | info:pmid/17079485#body:85                      |
| MAPK3 ---> mitochondrial damage           | Regulation | info:pmid/14647418#body:119                     |
| MAPK3 ---> mitochondrial damage           | Regulation | info:pmid/12492110#body:165                     |
| MAPK3 ---> nervous system development     | Regulation | info:pmid/22095091#abs:1                        |
| MAPK3 ---> nervous system development     | Regulation | info:pmid/18635547#body:165                     |
| MAPK3 ---> nervous system development     | Regulation | info:pmid/22427945#cont:375                     |
| MAPK3 ---> nervous system development     | Regulation | info:pmid/24411019#body:1                       |
| MAPK3 ---> nervous system development     | Regulation | info:pmid/16880823#body:87                      |
| MAPK3 ---> Neurodegenerative Diseases     | Regulation | info:pmid/21347512#cont:36                      |
| MAPK3 ---> Neurodegenerative Diseases     | Regulation | info:pmid/24103374#body:94                      |
| MAPK3 ---> Neurodegenerative Diseases     | Regulation | info:pmid/19038359#body:21                      |
| MAPK3 ---> Neurodegenerative Diseases     | Regulation | info:pmid/18272143#body:14                      |
| MAPK3 ---> neuronal activity              | Regulation | info:pmid/19541375#body:97                      |
| MAPK3 ---> neuronal activity              | Regulation | info:pmid/17942733#body:54                      |
| MAPK3 ---> neuronal plasticity            | Regulation | info:pmid/16326014#abs:1                        |
| MAPK3 ---> neuronal plasticity            | Regulation | info:pmid/16431218#body:52                      |
| MAPK3 ---> neuronal plasticity            | Regulation | info:pmid/17085074#body:17                      |
| MAPK3 ---> neuronal plasticity            | Regulation | info:pmid/18272143#body:13                      |
| MAPK3 ---> neuronal plasticity            | Regulation | info:pmid/18191237#body:99                      |
| MAPK3 ---> neuronal plasticity            | Regulation | info:pmid/16139811#body:15                      |
| MAPK3 ---> neuronal plasticity            | Regulation | info:pmid/20060019#body:202                     |
| MAPK3 ---> neuronal plasticity            | Regulation | info:pmid/21167873#body:24                      |
| MAPK3 ---> neurotransmitter secretion     | Regulation | info:pmid/15265865#body:61                      |
| MAPK3 ---> regulation of action potential | Regulation | info:pmid/17675293#body:83                      |
| MAPK3 ---> regulation of action potential | Regulation | info:pmid/12551961#body:220                     |
| MAPK3 ---  Nervous System Diseases        | Regulation | info:pmid/20922651#cont:266                     |
| MAPK3 ---  synaptic vesicle exocytosis    | Regulation | info:pmid/21430174#abs:3                        |

|                                          |            |                                               |
|------------------------------------------|------------|-----------------------------------------------|
| MAPK3 ---  synaptic vesicle exocytosis   | Regulation | info:pmid/23616533#cont:99                    |
| MTERFD1 --> mitochondrial depolarization | Regulation | info:pmid/21381862#abs:10                     |
| MVP ---  DNA repair                      | Regulation | info:pmid/19251084#body:37                    |
| NAMPT --> DNA repair                     | Regulation | info:pmid/20103674#body:312                   |
| NAMPT --> MAPK3                          | Regulation | info:pmid/21945543#abs:7                      |
| NAMPT --> MAPK3                          | Regulation | info:pmid/17408594#abs:5                      |
| NAMPT --> MAPK3                          | Regulation | info:pmid/20647743#abs:3                      |
| NAMPT --> MAPK3                          | Regulation | info:pmid/18952695#abs:5                      |
| NAMPT --> MAPK3                          | Regulation | info:pmid/19906834#abs:9                      |
| NAMPT --> MAPK3                          | Regulation | info:pmid/20375985#abs:8                      |
| NAMPT --> MAPK3                          | Regulation | info:pmid/21327328#cont:103                   |
| NAMPT --> MAPK3                          | Regulation | info:pmid/22089115#cont:328                   |
| NAMPT --> MAPK3                          | Regulation | info:pmid/17543285#body:10                    |
| NAMPT --> MAPK3                          | Regulation | info:pmid/23160967#cont:291                   |
| NAMPT --> MAPK3                          | Regulation | info:pmid/21471274#cont:495                   |
| NAMPT --> MAPK3                          | Regulation | info:pmid/23787158#body:148                   |
| NAMPT --> MAPK3                          | Regulation | info:pmid/19081303#body:11                    |
| NAMPT --> MAPK3                          | Regulation | info:pmid/22293189#body:57                    |
| NAMPT --> MAPK3                          | Regulation | info:pmid/20537826#body:94                    |
| NAMPT --> MAPK3                          | Regulation | info:pmid/21738955#cont:139                   |
| NAMPT --> MAPK3                          | Regulation | info:pmid/19819277#body:85                    |
| NAMPT --> MAPK3                          | Regulation | info:pmid/20920528#body:202                   |
| NAMPT --> MAPK3                          | Regulation | info:pmid/23843684#cont:222                   |
| NAMPT --> MAPK3                          | Regulation | info:pmid/23022179#body:302                   |
| NAMPT --> MAPK3                          | Regulation | info:pmid/19393628#body:11                    |
| NAMPT --> MAPK3                          | Regulation | info:doi/10.2174/138161212803582531#cont:650  |
| NAMPT --> MAPK3                          | Regulation | info:doi/10.2174/1871529X11313010007#cont:235 |
| NAMPT ---> chronic inflammation          | Regulation | info:pmid/19717018#body:7                     |
| NAMPT ---> DNA repair                    | Regulation | info:pmid/22704488#abs:5                      |
| NAMPT ---> immune response               | Regulation | info:pmid/17374397#body:186                   |
| NAMPT ---> immune response               | Regulation | info:pmid/23531116#cont:110                   |
| NAMPT ---> immune response               | Regulation | info:pmid/20598369#body:13                    |
| NAMPT ---> immune response               | Regulation | info:pmid/23466352#body:2                     |
| NAMPT ---> immune response               | Regulation | info:pmid/19240195#body:130                   |
| NAMPT ---> immune response               | Regulation | info:pmid/17507280#body:121                   |
| NAMPT ---> mitochondrial depolarization  | Regulation | info:pmid/22044451#title:1                    |
| NAMPT ---> mitochondrial depolarization  | Regulation | info:pmid/22960047#body:84                    |

|                                                   |            |                                                    |
|---------------------------------------------------|------------|----------------------------------------------------|
| NAMPT ---> neuronal activity                      | Regulation | info:pmid/23071504#cont:102                        |
| NAMPT ---  mitochondrial damage                   | Regulation | info:pmid/21471274#cont:214                        |
| NAMPT ---  mitochondrial damage                   | Regulation | info:pmid/19661458#body:120                        |
| NAMPT ---  mitochondrial damage                   | Regulation | info:pmid/22904041#cont:309                        |
| NAMPT ---  neuronal death                         | Regulation | info:pmid/23843684#cont:295                        |
| NRXN1 --> synaptic transmission                   | Regulation | info:pmid/19822762#body:64                         |
| NRXN1 --> synaptic transmission                   | Regulation | info:pmid/23426688#cont:361                        |
| NRXN1 --> synaptic transmission                   | Regulation | info:pmid/15858059#body:172                        |
| NRXN1 --> synaptic transmission                   | Regulation | info:doi/10.1016/j.neuropharm.2011.01.024#body:127 |
| NRXN1 ---> Asperger Syndrome                      | Regulation | info:pmid/19545994#abs:4                           |
| NRXN1 ---> Asperger Syndrome                      | Regulation | info:pmid/22798074#cont:236                        |
| NRXN1 ---> Autistic Disorder                      | Regulation | info:pmid/17034946#abs:7                           |
| NRXN1 ---> Autistic Disorder                      | Regulation | info:pmid/19545994#abs:4                           |
| NRXN1 ---> Autistic Disorder                      | Regulation | info:pmid/21477380#abs:1                           |
| NRXN1 ---> Autistic Disorder                      | Regulation | info:pmid/17498701#body:10                         |
| NRXN1 ---> Autistic Disorder                      | Regulation | info:pmid/22798074#cont:236                        |
| NRXN1 ---> Autistic Disorder                      | Regulation | info:pmid/18179900#body:62                         |
| NRXN1 ---> brain development                      | Regulation | info:pmid/21946175#body:128                        |
| NRXN1 ---> Child Development Disorders, Pervasive | Regulation | info:pmid/18179900#abs:7                           |
| NRXN1 ---> Mental Disorders                       | Regulation | info:doi/10.1016/j.neuropharm.2011.02.003#body:10  |
| NRXN1 ---> neuron network morphology              | Regulation | info:pmid/23536886#cont:280                        |
| NRXN1 ---> neurotransmitter secretion             | Regulation | info:pmid/9430716#body:241                         |
| NRXN1 ---> neurotransmitter secretion             | Regulation | info:pmid/15797875#body:67                         |
| NRXN1 ---> Schizophrenia                          | Regulation | info:pmid/21477380#abs:1                           |
| NRXN1 ---> Schizophrenia                          | Regulation | info:pmid/22348092#cont:14                         |
| NRXN1 ---> Schizophrenia                          | Regulation | info:pmid/21890328#body:91                         |
| NRXN1 ---> Schizophrenia                          | Regulation | info:pmid/21687627#cont:105                        |
| NRXN1 ---> Schizophrenia                          | Regulation | info:pmid/21946175#body:123                        |
| NRXN1 ---> synaptogenesis                         | Regulation | info:pmid/20064388#abs:7                           |
| NRXN1 ---> synaptogenesis                         | Regulation | info:pmid/18270208#abs:1                           |
| NRXN1 ---> synaptogenesis                         | Regulation | info:pmid/17868325#abs:2                           |
| NRXN1 ---> synaptogenesis                         | Regulation | info:pmid/15723836#body:170                        |
| NRXN1 ---> synaptogenesis                         | Regulation | info:pmid/21890328#body:5                          |

|                                         |            |                                               |
|-----------------------------------------|------------|-----------------------------------------------|
| NRXN1 ---> synaptogenesis               | Regulation | info:pmid/17498701#title:1                    |
| NRXN1 ---> synaptogenesis               | Regulation | info:pmid/20739565#cont:267                   |
| NRXN1 ---> synaptogenesis               | Regulation | info:pmid/23133594#cont:366                   |
| NRXN1 ---> synaptogenesis               | Regulation | info:pmid/18829439#body:192                   |
| NRXN1 ---> synaptogenesis               | Regulation | info:pmid/21394644#cont:111                   |
| NRXN1 ---> synaptogenesis               | Regulation | info:pmid/11173120#body:46                    |
| NRXN1 ---> synaptogenesis               | Regulation | info:pmid/23358242#cont:21                    |
| NRXN1 ---> synaptogenesis               | Regulation | info:pmid/21935445#cont:21                    |
| NRXN1 ---> synaptogenesis               | Regulation | info:pmid/22617343#cont:27                    |
| NRXN1 ---> synaptogenesis               | Regulation | info:pmid/19492049#body:120                   |
| NRXN1 ---> synaptogenesis               | Regulation | info:doi/10.1016/j.ajhg.2013.02.007#body:16   |
| PPP4C ---> DNA repair                   | Regulation | info:pmid/21135129#abs:7                      |
| PTDSS1 --> axonogenesis                 | Regulation | info:pmid/18343815#body:320                   |
| RYR2 --> mitochondrial depolarization   | Regulation | info:pmid/18950706#body:83                    |
| RYR2 --> neurotransmitter secretion     | Regulation | info:pmid/21113126#body:191                   |
| RYR2 --> regulation of action potential | Regulation | info:pmid/24141185#cont:228                   |
| RYR2 --> regulation of action potential | Regulation | info:pmid/12543086#body:251                   |
| RYR2 --> regulation of action potential | Regulation | info:pmid/22723297#cont:379                   |
| RYR2 ---> Developmental Disabilities    | Regulation | info:pmid/22814392#abs:8                      |
| RYR2 ---> nervous system development    | Regulation | info:pmid/18602130#abs:7                      |
| RYR2 ---> synaptic transmission         | Regulation | info:pmid/19641109#body:170                   |
| SPN ---> immune response                | Regulation | info:pmid/12055210#abs:6                      |
| SPN ---> immune response                | Regulation | info:pmid/10908570#body:316                   |
| SPN ---> immune response                | Regulation | info:pmid/11024037#body:65                    |
| SPN ---> immune response                | Regulation | info:pmid/9351819#body:211                    |
| SPN ---> immune response                | Regulation | info:pmid/16246302#body:11                    |
| SPN ---> immune response                | Regulation | info:pmid/21768350#cont:31                    |
| SPN ---> immune response                | Regulation | info:pmid/16890924#body:15                    |
| SPN ---> immune response                | Regulation | info:pmid/10521289#body:123                   |
| SPN ---> immune response                | Regulation | info:doi/10.1016/S0966-842X(00)01837-0#body:7 |
| SPN ---> immune response                | Regulation | info:pmid/9862667#body:48                     |
| SPN ---> immune response                | Regulation | info:pmid/10521289#body:569                   |
| SPN ---> immune response                | Regulation | info:pmid/15606794#body:394                   |
| SPN ---  synaptogenesis                 | Regulation | info:pmid/19351959#body:105                   |
| TAOK2 ---> neuronal activity            | Regulation | info:pmid/19541375#body:97                    |
| TBX6 ---> neuronal plasticity           | Regulation | info:pmid/19070637#body:248                   |

|                                      |            |                             |
|--------------------------------------|------------|-----------------------------|
| TBX6 ---  nervous system development | Regulation | info:pmid/10468588#body:46  |
| ZIC1 ---> Developmental Disabilities | Regulation | info:pmid/23313878#body:79  |
| ZIC1 ---> MAPK3                      | Regulation | info:pmid/22799764#cont:86  |
| ZIC1 ---> MAPK3                      | Regulation | info:pmid/21347233#cont:55  |
| ZIC1 ---> nervous system development | Regulation | info:pmid/22799764#cont:21  |
| ZIC1 ---  ZIC4                       | Expression | info:pmid/15210192#body:101 |
| ZIC4 ---> Developmental Disabilities | Regulation | info:pmid/23313878#body:79  |
| ZIC4 ---> nervous system development | Regulation | info:pmid/15895369#body:170 |
| ZIC4 ---  ZIC1                       | Expression | info:pmid/15210192#body:101 |
| ZP4 --+> immune response             | Regulation | info:pmid/22415139#abs:11   |

**Supplementary table 5.** General information about the families included in the study.

| Family ID | Consanguineous | Family fully analyzed | Family member ID | Status         | Gender | Diagnosis    |
|-----------|----------------|-----------------------|------------------|----------------|--------|--------------|
| SES 2     | X              | X                     | F2-05            | Autistic       | M      | Autistic     |
|           |                |                       | F2-06            | Sibling        | F      | Non autistic |
|           |                |                       | F2-07            | Sibling        | M      | Non autistic |
|           |                |                       | F2-08            | Father         | M      | Non autistic |
|           |                |                       | F2-09            | Mother         | F      | Non autistic |
| SES 3     |                | X                     | F3-10            | autistic child | M      | Autistic     |
|           |                |                       | F3-11            | autistic child | F      | Autistic     |
|           |                |                       | F3-12            | Sibling        | M      | Non autistic |
|           |                |                       | F3-13            | Father         | M      | Non autistic |
|           |                |                       | F3-14            | Mother         | F      | Non autistic |
| SES 5     |                | X                     | F5-20            | autistic child | M      | Autistic     |
|           |                |                       | F5-21            | Sibling        | M      | Non autistic |
|           |                |                       | F5-22            | Father         | M      | Non autistic |
|           |                |                       | F5-23            | Mother         | F      | Non autistic |
| LAS 6     |                | X                     | F6-24            | autistic child | M      | Autistic     |
|           |                |                       | F6-26            | Sibling        | F      | Non autistic |
|           |                |                       | F6-27            | Father         | M      | Non autistic |
|           |                |                       | F6-28            | Mother         | F      | Non autistic |
| LAS 7     |                | X                     | F7-29            | autistic child | M      | Autistic     |
|           |                |                       | F7-30            | Sibling        | F      | Non autistic |

|         |   |   |        |                |   |              |
|---------|---|---|--------|----------------|---|--------------|
|         |   |   | F7-31  | Sibling        | F | Non autistic |
|         |   |   | F7-32  | Father         | M | Non autistic |
|         |   |   | F7-33  | Mother         | F | Non autistic |
| LAS 8   |   | X | F8-34  | autistic child | M | Autistic     |
|         |   |   | F8-36  | Father         | M | Non autistic |
|         |   |   | F8-37  | Mother         | F | Non autistic |
| LAS 9   |   | X | F9-38  | autistic child | M | Autistic     |
|         |   |   | F9-39  | Sibling        | M | Non autistic |
|         |   |   | F9-40  | Father         | M | Non autistic |
|         |   |   | F9-41  | Mother         | F | Non autistic |
| LAS 10  | X |   | F10-42 | autistic child | M | Autistic     |
|         |   |   | F10-43 | Sibling        | M | Non autistic |
|         |   |   | F10-44 | Sibling        | M | Non autistic |
|         |   |   | F10-45 | Sibling        | M | Non autistic |
|         |   |   | F10-47 | Mother         | F | Non autistic |
| LAS 11  | X | X | F11-48 | autistic child | M | Autistic     |
|         |   |   | F11-49 | Sibling        | F | Non autistic |
|         |   |   | F11-50 | Sibling        | F | Non autistic |
|         |   |   | F11-51 | Father         | M | Non autistic |
|         |   |   | F11-52 | Mother         | F | Non autistic |
| LAS 15  | X | X | F15-70 | autistic child | M | Autistic     |
|         |   |   | F15-71 | Sibling        | F | Non autistic |
|         |   |   | F15-72 | Sibling        | M | Non autistic |
|         |   |   | F15-73 | Father         | M | Non autistic |
|         |   |   | F15-74 | Mother         | F | Non autistic |
| LAS 17  |   | X | F17-80 | autistic child | M | Autistic     |
|         |   |   | F17-81 | Father         | M | Non autistic |
|         |   |   | F17-82 | Mother         | F | Non autistic |
| CLIN 18 |   | X | F18-83 | autistic child | M | Autistic     |
|         |   |   | F18-84 | Sibling        | M | Non autistic |
|         |   |   | F18-86 | Father         | M | Non autistic |
|         |   |   | F18-87 | Mother         | F | Non autistic |
| CLIN 19 |   | X | F19-88 | autistic child | M | Autistic     |
|         |   |   | F19-89 | autistic child | M | Autistic     |
|         |   |   | F19-90 | Sibling        | F | Non autistic |
|         |   |   | F19-91 | Father         | M | Non autistic |
|         |   |   | F19-92 | Mother         | F | Non autistic |
| CLIN 20 |   | X | F20-93 | autistic child | M | Autistic     |
|         |   |   | F20-94 | Sibling        | F | Non autistic |
|         |   |   | F20-95 | Sibling        | F | Non autistic |

|        |   |   |         |                |   |              |
|--------|---|---|---------|----------------|---|--------------|
|        |   |   | F20-96  | Father         | M | Non autistic |
|        |   |   | F20-97  | Mother         | F | Non autistic |
| CLIN22 |   | X | F22-101 | autistic child | M | Autistic     |
|        |   |   | F22-102 | Father         | M | Non autistic |
|        |   |   | F22-103 | Mother         | M | Non autistic |
| CLIN24 |   | X | F24-108 | autistic child | M | Autistic     |
|        |   |   | F24-109 | Sibling        | F | Non autistic |
|        |   |   | F24-110 | Sibling        | M | Non autistic |
|        |   |   | F24-111 | Father         | M | Non autistic |
|        |   |   | F24-112 | Mother         | F | Non autistic |
| CLIN27 | X | X | F27-122 | autistic child | M | Autistic     |
|        |   |   | F27-123 | Sibling        | F | Non autistic |
|        |   |   | F27-124 | Sibling        | M | Non autistic |
|        |   |   | F27-125 | Father         | M | Non autistic |
|        |   |   | F27-126 | Mother         | F | Non autistic |
| CLIN28 | X | X | F28-127 | autistic child | M | Autistic     |
|        |   |   | F28-131 | Father         | M | Non autistic |
|        |   |   | F28-132 | Mother         | F | Non autistic |
| CLIN29 |   | X | F29-133 | autistic child | M | Autistic     |
|        |   |   | F29-134 | Sibling        | F | Non autistic |
|        |   |   | F29-136 | Father         | M | Non autistic |
|        |   |   | F29-137 | Mother         | F | Non autistic |
| SAI31  |   | X | F31-145 | autistic child | M | Autistic     |
|        |   |   | F31-146 | Father         | M | Non autistic |
|        |   |   | F31-147 | Mother         | F | Non autistic |
| SAI32  | X | X | F32-148 | Autistic       | M | Autistic     |
|        |   |   | F32-149 | Sibling        | M | Non autistic |
|        |   |   | F32-150 | Father         | M | Non autistic |
|        |   |   | F32-151 | Mother         | F | Non autistic |
| SAI33  |   | X | F33-152 | autistic child | M | Autistic     |
|        |   |   | F33-156 | Father         | M | Non autistic |
|        |   |   | F33-157 | Mother         | F | Non autistic |
| SAI34  |   | X | F34-158 | autistic child | M | Autistic     |
|        |   |   | F34-159 | Sibling        | F | Non autistic |
|        |   |   | F34-160 | Sibling        | M | Non autistic |
|        |   |   | F34-161 | Sibling        | F | Non autistic |
|        |   |   | F34-162 | Father         | M | Non autistic |
|        |   |   | F34-163 | Mother         | F | Non autistic |
| CLIN35 |   | X | F35-164 | autistic child | F | Autistic     |
|        |   |   | F35-165 | Sibling        | F | Non autistic |



|        |   |   |         |                |   |              |
|--------|---|---|---------|----------------|---|--------------|
|        |   |   | F35-166 | Sibling        | F | Non autistic |
|        |   |   | F35-167 | Father         | M | Non autistic |
|        |   |   | F35-168 | Mother         | F | Non autistic |
| CLIN36 |   | X | F36-169 | autistic child | M | Autistic     |
|        |   |   | F36-170 | Father         | M | Non autistic |
|        |   |   | F36-171 | Mother         | F | Non autistic |
| BAK37  |   | X | F37-172 | autistic child | M | Autistic     |
|        |   |   | F37-173 | Sibling        | F | Non autistic |
|        |   |   | F37-174 | Father         | M | Non autistic |
|        |   |   | F37-175 | Mother         | F | Non autistic |
| BAK38  |   | X | F38-176 | autistic child | M | Autistic     |
|        |   |   | F38-177 | Sibling        | M | Non autistic |
|        |   |   | F38-178 | Father         | M | Non autistic |
|        |   |   | F38-179 | Mother         | F | Non autistic |
| BAK39  |   | X | F39-180 | autistic child | M | Autistic     |
|        |   |   | F39-181 | Sibling        | F | Non autistic |
|        |   |   | F39-182 | Sibling        | M | Non autistic |
|        |   |   | F39-184 | Father         | M | Non autistic |
|        |   |   | F39-185 | Mother         | F | Non autistic |
| BAK40  |   | X | F40-186 | autistic child | M | Autistic     |
|        |   |   | F40-187 | Sibling        | F | Non autistic |
|        |   |   | F40-188 | Father         | M | Non autistic |
|        |   |   | F40-189 | Mother         | F | Non autistic |
| BAK41  |   | X | F41-190 | autistic child | M | Autistic     |
|        |   |   | F41-192 | Father         | M | Non autistic |
|        |   |   | F41-193 | Mother         | F | Non autistic |
| BAK42  |   | X | F42-194 | autistic child | M | Autistic     |
|        |   |   | F42-195 | Father         | M | Non autistic |
|        |   |   | F42-196 | Mother         | F | Non autistic |
| CLIN43 |   | X | F43-197 | autistic child | M | Autistic     |
|        |   |   | F43-198 | Sibling        | F | Non autistic |
|        |   |   | F43-199 | Father         | M | Non autistic |
|        |   |   | F43-200 | Mother         | F | Non autistic |
| CLIN44 |   | X | F44-201 | autistic child | M | Autistic     |
|        |   |   | F44-202 | Sibling        | m | Non autistic |
|        |   |   | F44-203 | Father         | M | Non autistic |
|        |   |   | F44-204 | Mother         | F | Non autistic |
| CLIN45 | X | X | F45-205 | autistic child | M | Autistic     |
|        |   |   | F45-206 | Sibling        | F | Non autistic |
|        |   |   | F45-207 | Sibling        | M | Non autistic |

|        |  |   |         |                |   |              |
|--------|--|---|---------|----------------|---|--------------|
|        |  |   | F45-208 | Sibling        | M | Non autistic |
|        |  |   | F45-209 | Father         | M | Non autistic |
|        |  |   | F45-210 | Mother         | F | Non-autistic |
| CLIN46 |  | X | F46-211 | Sibling        | F | Autistic     |
|        |  |   | F46-212 | Father         | M | Non autistic |
|        |  |   | F46-213 | Mother         | F | Non autistic |
| Clin47 |  | X | F47-214 | Sibling        | F | Autistic     |
|        |  |   | F47-215 | Sibling        | M | Non autistic |
|        |  |   | F47-216 | Father         | M | Non autistic |
|        |  |   | F47-217 | Mother         | F | Non autistic |
| 1A68   |  |   | 1A68-   | autistic child | M | Autistic     |
| 1A69   |  |   | 1A69-   | autistic child | M | Autistic     |
| 3A146  |  |   | 3A146-  | autistic child | M | Autistic     |

## Supplementary tables legends

**Supplementary table 1. *De novo* CNVs identified in patients with ASD classified as benign and likely benign.** The chromosome location, as well as the CNV type (gain referring to a duplication, loss referring to a deletion), length and gene content are given. Genomic positions are given according to Human Genome Building GCRh37, HG19.

**Supplementary table 2. Inherited CNVs identified in patients with ASD classified as benign and likely benign.** The chromosome location, as well as the CNV type (gain referring to a duplication, loss referring to a deletion), length and gene content are given. Genomic positions are given according to Human Genome Building GCRh37, HG19.

**Supplementary table 3. Gene ontology (GO) enrichment analysis among genes included in all CNVs classified as pathogenic, likely pathogenic, and of unknown significance.** Only categories reaching a statistical significance of Fisher Exact P-value corrected for multiple comparisons in Benjamini-Hochberg test are shown. Significance was set to a P-value <0.05.

**Supplementary table 4. Studies and citations for each relation within the network build between genes included in CNVs classified as pathogenic, likely pathogenic, and of unknown significance and different entities related to identified deficits in ASDs using Pathway studio.**

**Supplementary table 5. General information about the families included in the study.**
